# Supplementary material for: Sex differences in the development of vascular and renal lesions in mice with a simultaneous deficiency of Apoe and the integrin chain Itga8
Source: PubMed Central journal article supplement (PMC5450388; doi:10.1186/s13293-017-0141-y), 2017-05-30
Supplement: 13293_2017_141_MOESM4_ESM.pdf [file 13293_2017_141_MOESM4_ESM.pdf]

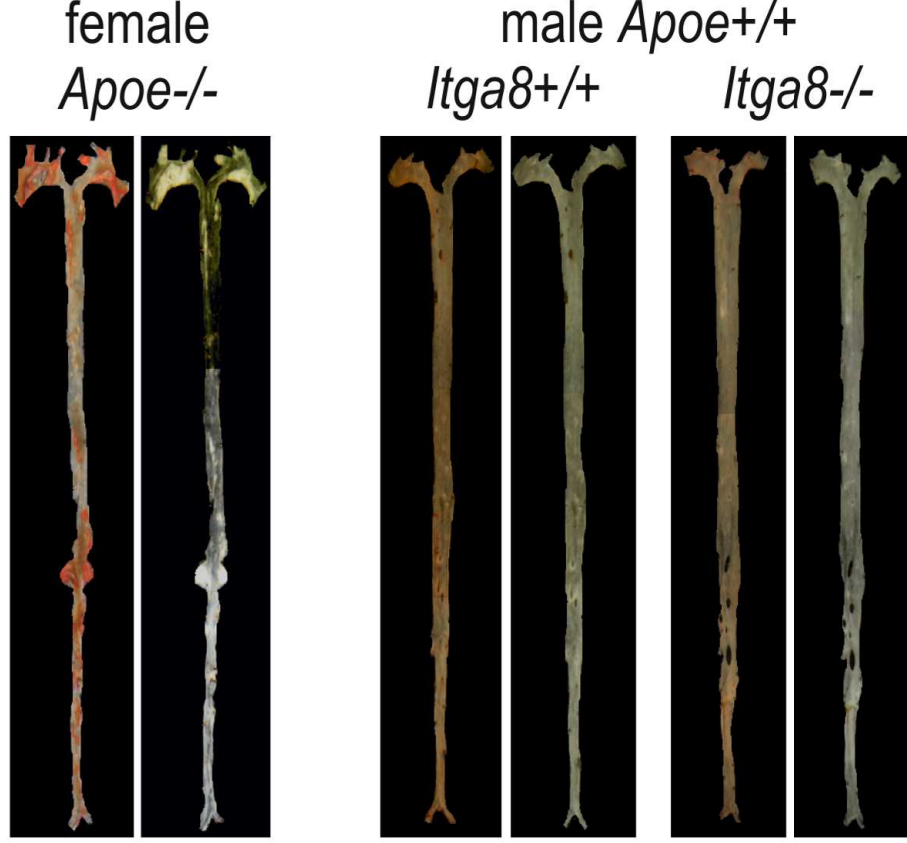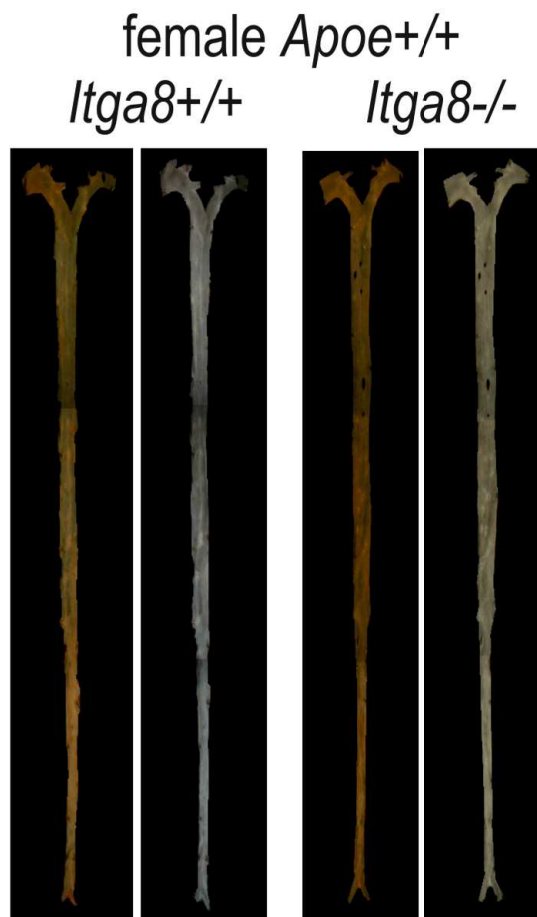

Additional file 4: Atherosclerotic plaque formation in mice without a deficiency for *ApoE*. Exemplary en face preparations of aortae of male and female *ApoE*<sup>+/+</sup> *Itga8*<sup>+/+</sup> or *ApoE*<sup>+/+</sup> *Itga8*<sup>-/-</sup> mice, stained with sudan IV (left) or unstained (right). One en face preparation of the aorta of an *ApoE*-deficient female mouse was stained for sudan IV as a positive control.
