# Supplementary material for: Sex differences in the development of vascular and renal lesions in mice with a simultaneous deficiency of Apoe and the integrin chain Itga8
Source: PubMed Central journal article supplement (PMC5450388; doi:10.1186/s13293-017-0141-y), 2017-05-30
Supplement: 13293_2017_141_MOESM5_ESM.pdf [file 13293_2017_141_MOESM5_ESM.pdf]

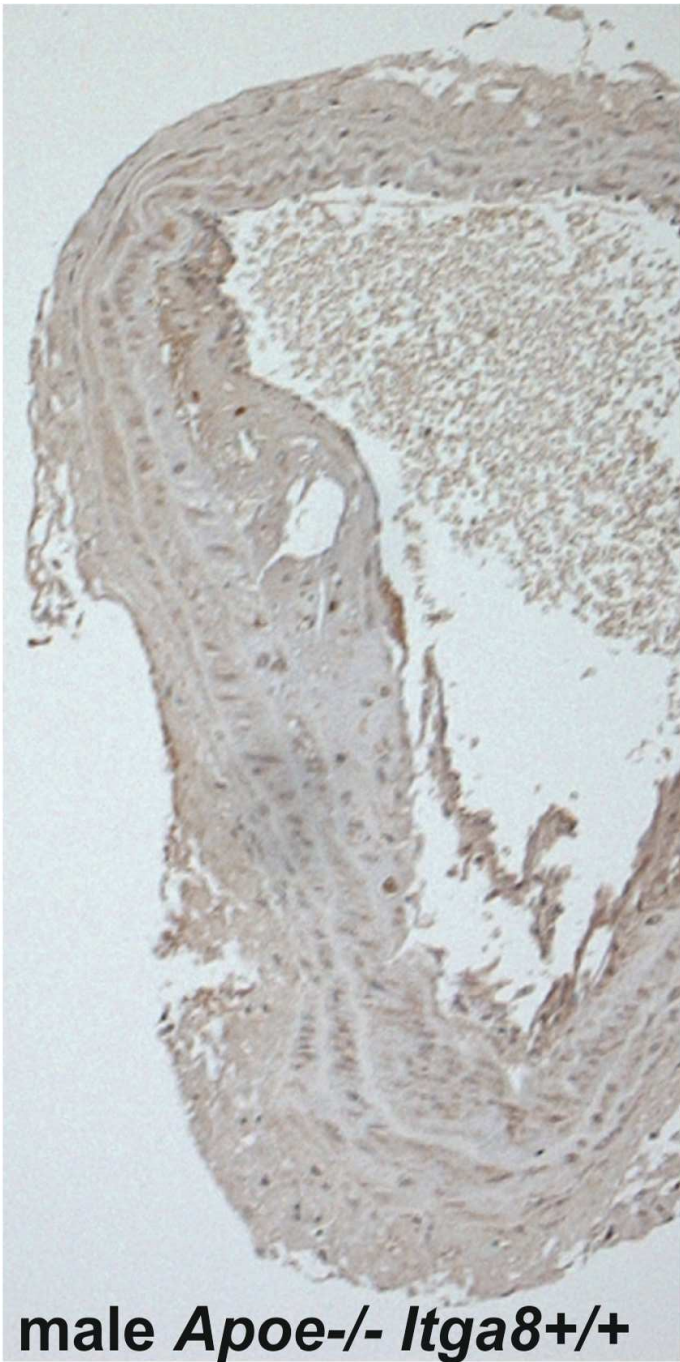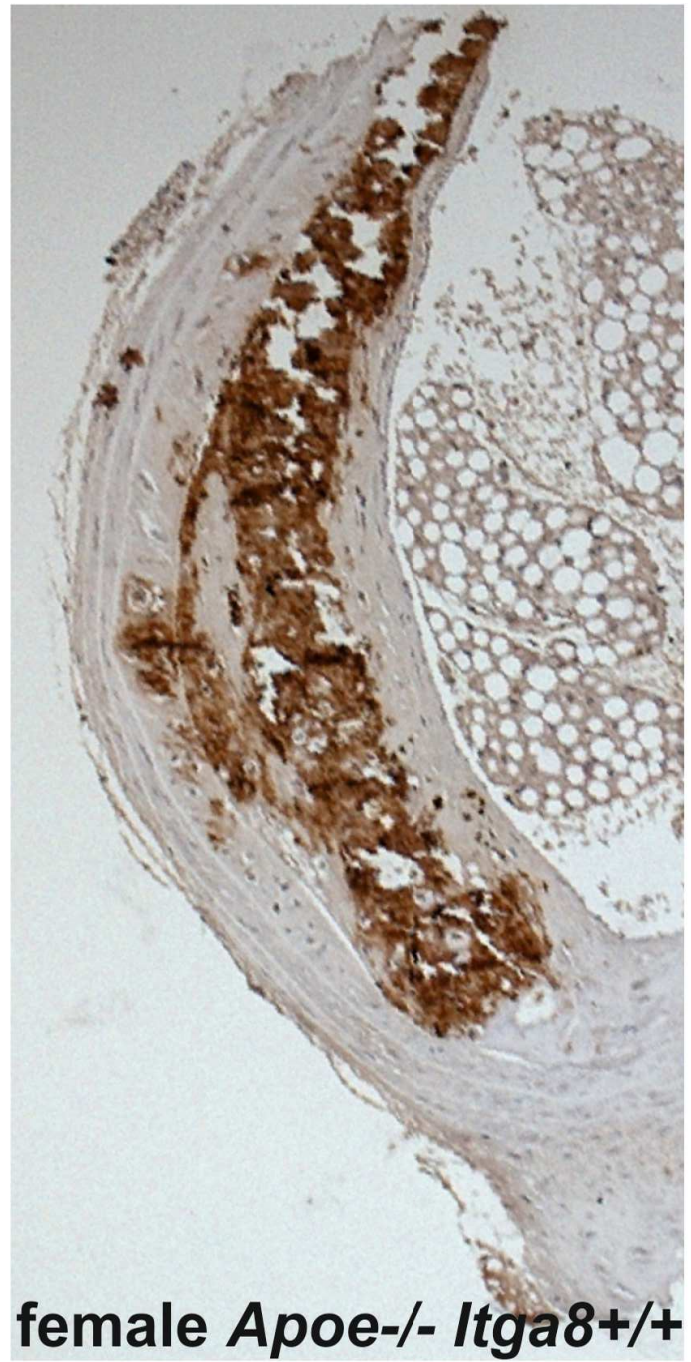

Additional file 5: Osteopontin in the brachiocephalic trunk.  
Exemplary osteopontin-stained cross sections of the brachiocephalic trunk of male and female mice with a deficiency for *Apoe*
