# Supplementary material for: Sex differences in the development of vascular and renal lesions in mice with a simultaneous deficiency of Apoe and the integrin chain Itga8
Source: Springer Nature journal article supplement (doi:10.1186/s13293-017-0141-y), 2017-05-30
Supplement: 13293_2017_141_MOESM7_ESM.pdf [file 13293_2017_141_MOESM7_ESM.pdf]

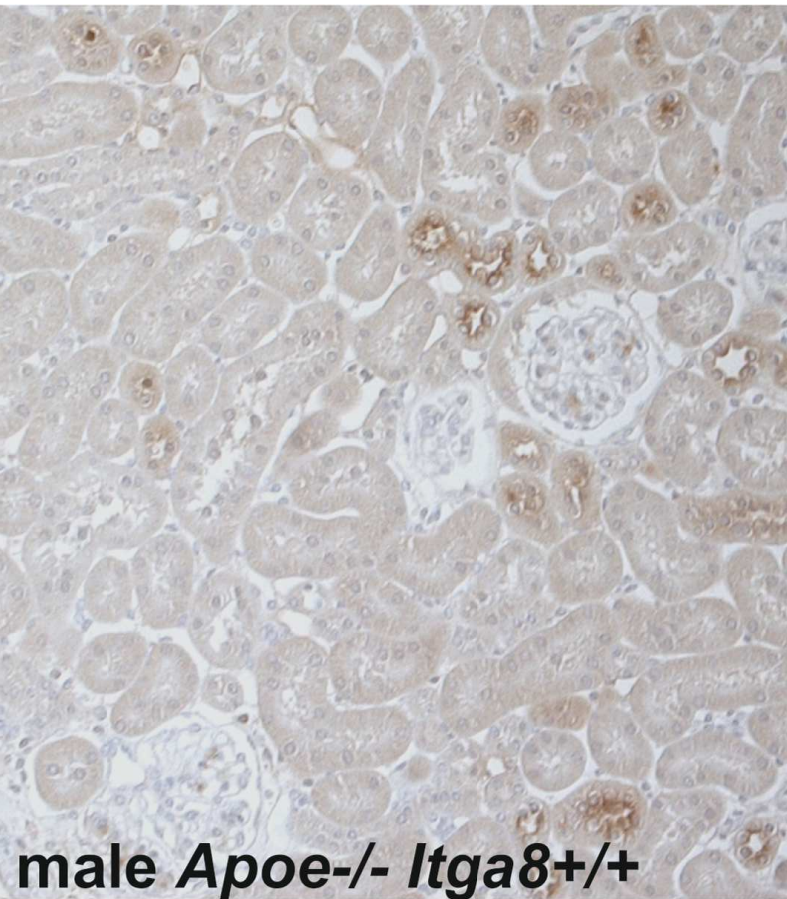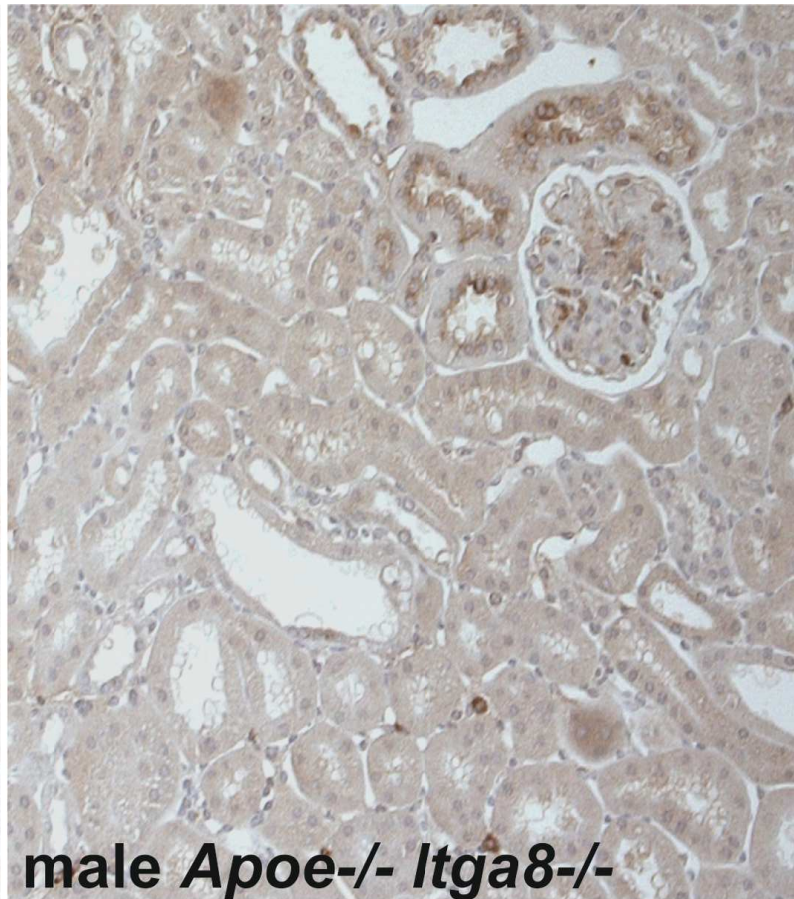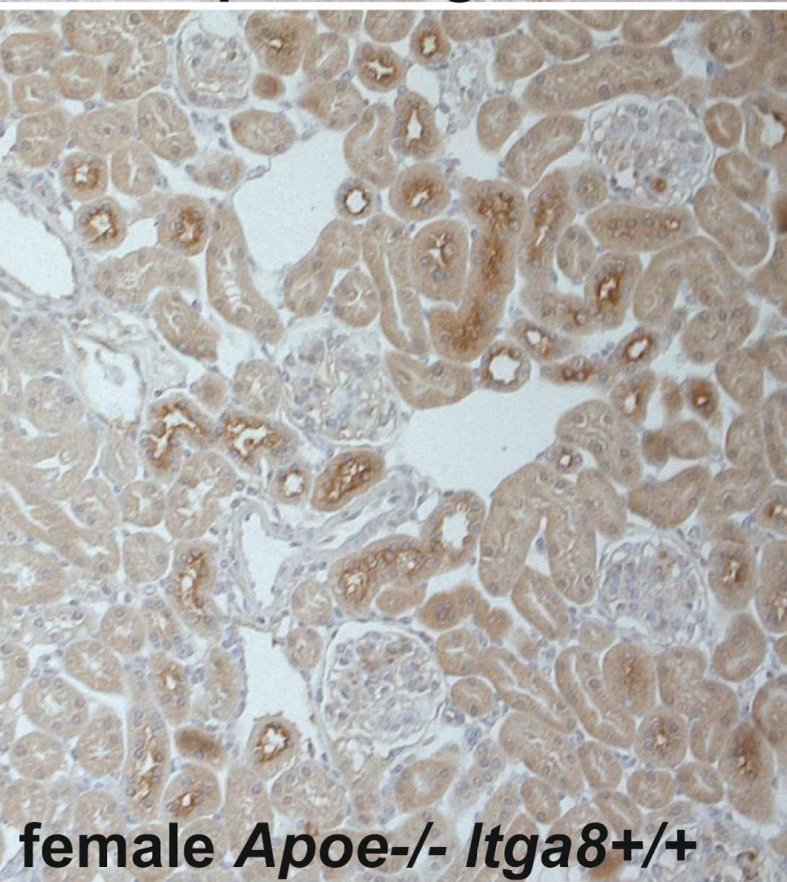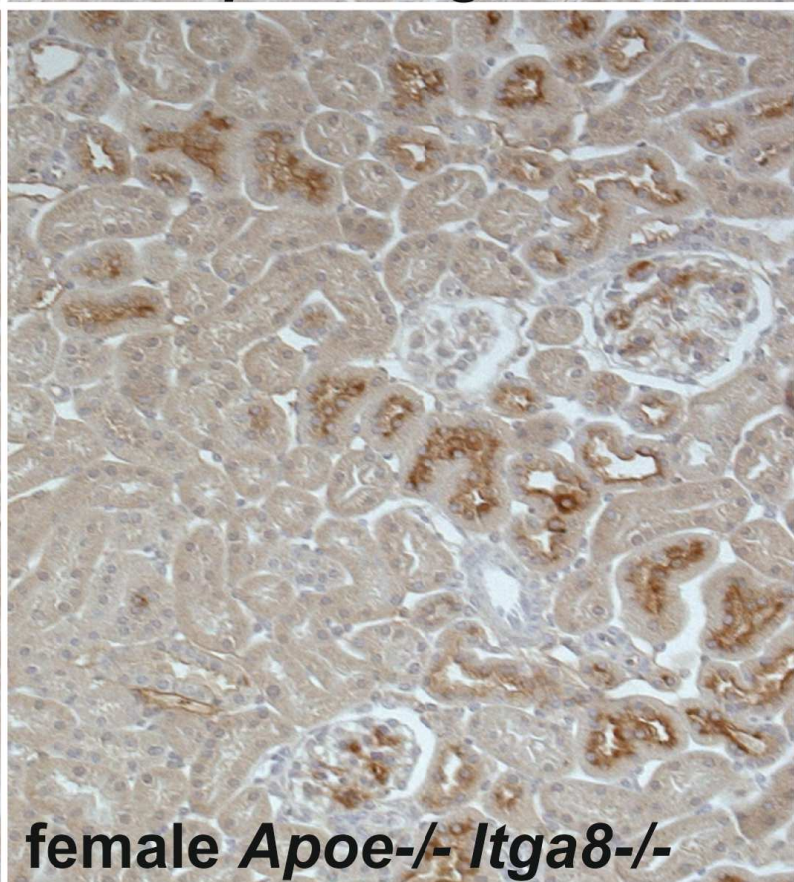

Additional file 7: Osteopontin in the kidney. Exemplary photomicrographs of osteopontin-stained renal sections of male and female *Apoe*<sup>-/-</sup> *Itga8*<sup>+/+</sup> or *Apoe*<sup>-/-</sup> *Itga8*<sup>-/-</sup> mice.
